# Supplementary material for: Homology Modeling and Optimized Expression of Truncated IK Protein, tIK, as an Anti-Inflammatory Peptide
Source: MDPI journal article supplement (doi:10.3390/molecules25194358), 2020-09-23
Supplement: s1 [file s1]

# Homology modeling and optimized expression of truncated IK protein, tIK, as an anti-inflammatory peptide

Yuyoung Song, Minseon Kim and Yongae Kim \*

Supplementary

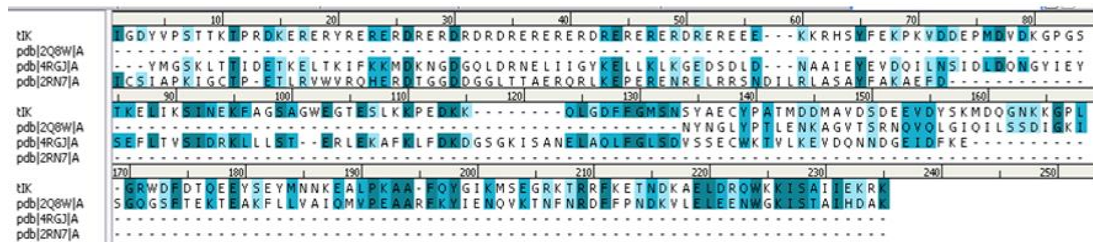

Supplementary 1. MSA and homology modeling using three selected template proteins and tIK.

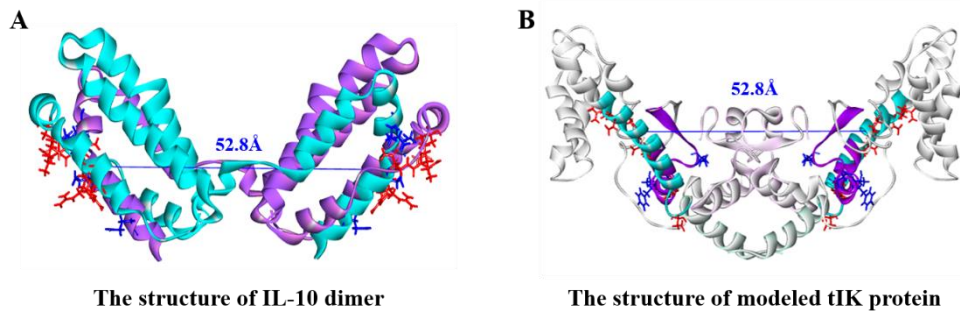

Supplementary 2. Comparison of IL-10 dimer and tIK dimer structures with high homology.

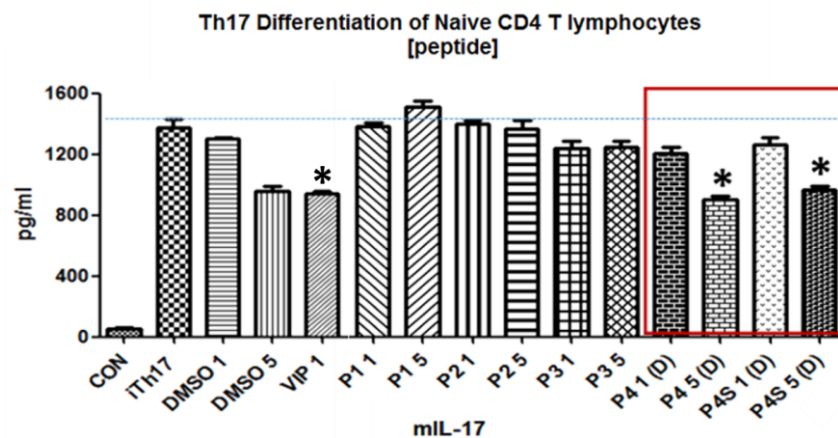

Supplementary 3. Anti-inflammatory test of tIK-YK1,2,3,4 and tIK-9 mer. Each is represented by P1,2,3,4,4S in order.
